# Supplementary material
Source: Springer Nature journal article supplement (https://www.springermedizin.de/resource/supplementary/12957_2013_1408_MOESM15_ESM.pdf/9562532)

A. and V. iliaca externa sinistra

Arterial vesicouterine anastomoses  
(lig. vesicouterinum), anterior part

N. obturatorius

Bladder

Bladder

A. vesicalis superior

Ureter

A. uterina  
dissected

Uterus

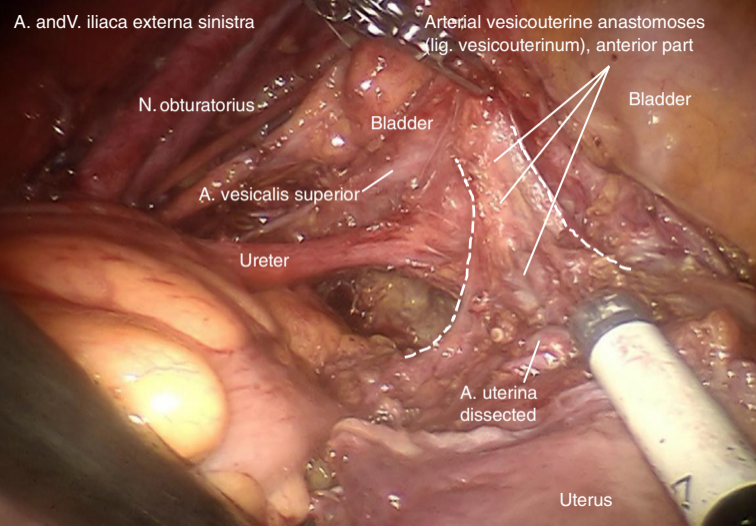

Supplement: MOESM15 [file 9562532]
